# Supplementary material for: Underestimation of the Maximal Capacity of the Mitochondrial Electron Transport System in Oligomycin-Treated Cells
Source: PubMed Central journal article supplement (PMC4780810; doi:10.1371/journal.pone.0150967), 2016-03-07
Supplement: pone.0150967.s003.pdf [file pone.0150967.s003.pdf]

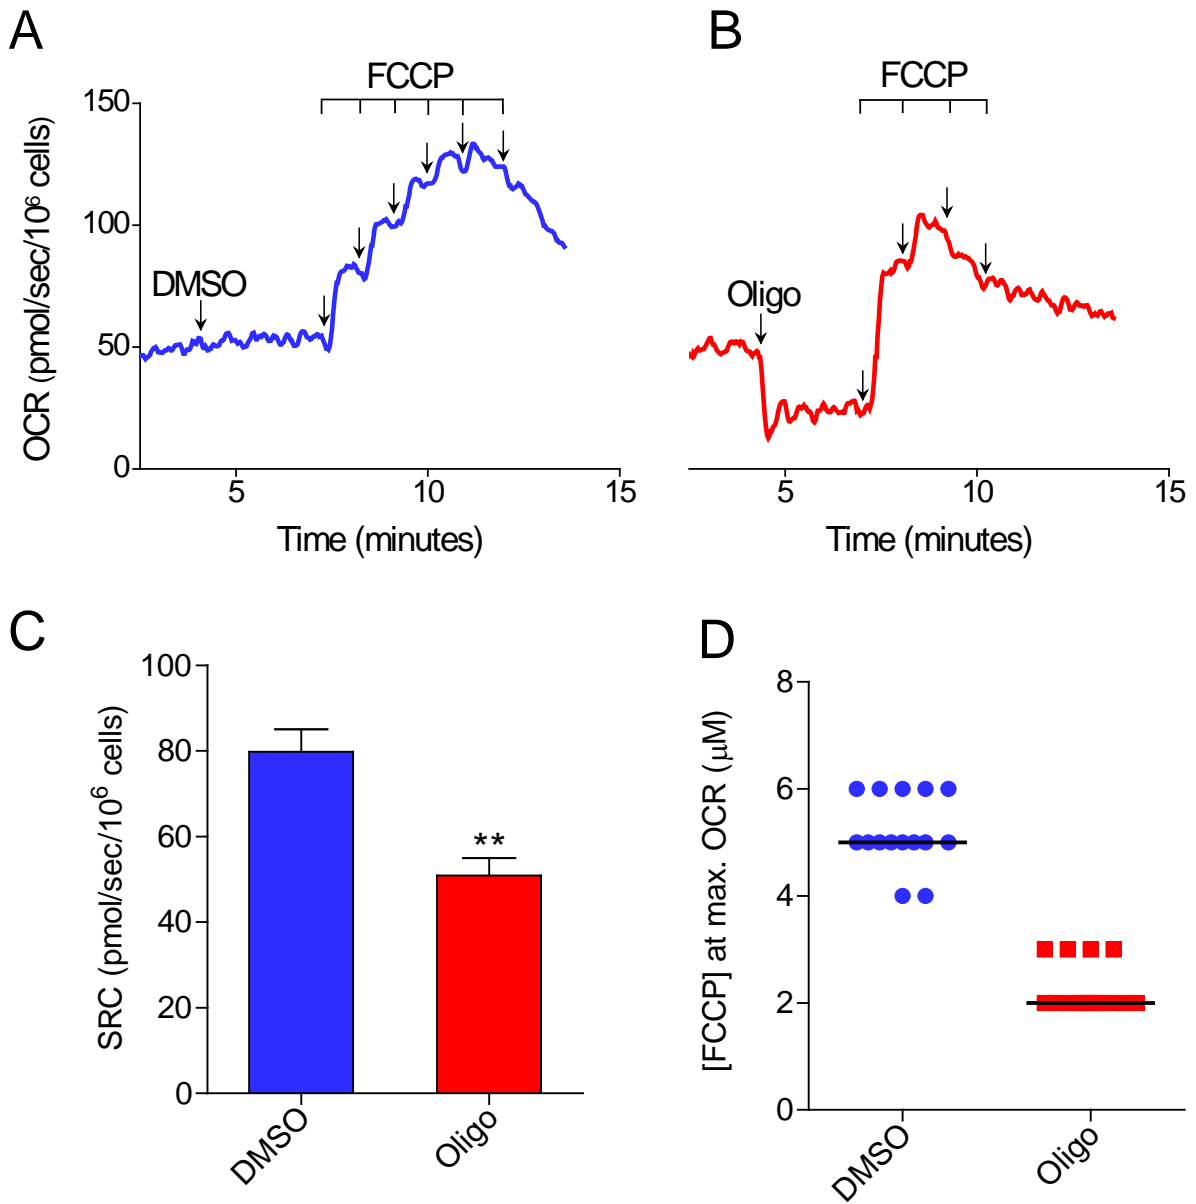

**S3 Fig.**

**Inhibitory effect of oligomycin on FCCP-induced maximal oxygen consumption by T98G cells.**
